# Supplementary material for: Unveiling a Novel Role of Cdc42 in Pyruvate Metabolism Pathway to Mediate Insecticidal Activity of Beauveria bassiana
Source: MDPI journal article supplement (doi:10.3390/jof8040394), 2022-04-12
Supplement: s1 [file s1]

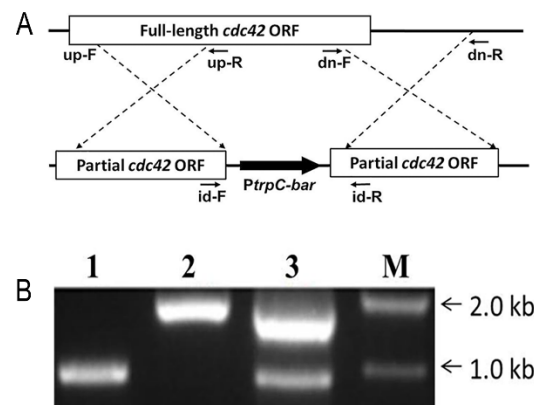

**Figure S1.** Construction of the *cdc42* mutants. **(A)** The strategy for *cdc42* deletion. **(B)** Gel electrophoresis for the identification of deletion and complementary strains. Lane 1: WT, lane 2:  $\Delta cdc42$ ; lane 3:  $\Delta cdc42::cdc42$ , M: marker.

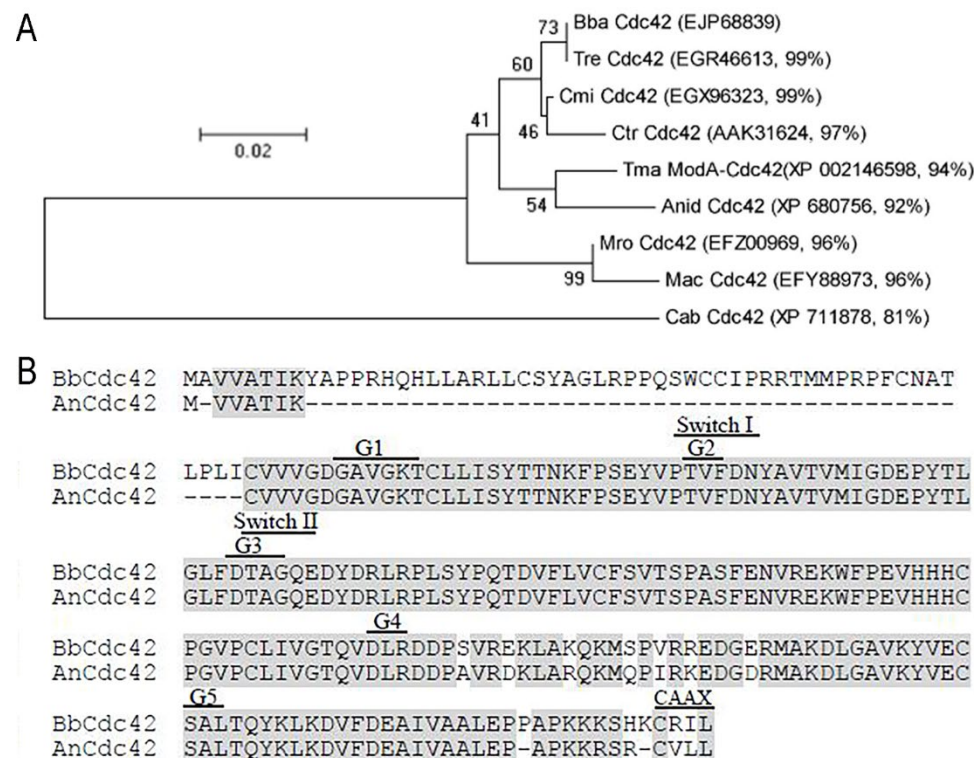

**Figure S2.** Phylogenetic analysis and the structural features of the Cdc42 in *B. bassiana* compared with several homologues. **(A)** Phylogenetic tree for Cdc42 homologues (NCBI codes and the identity in parentheses) in several fungi [*Beauveria bassiana* (Bba), *Trichoderma reesei* (Tre), *Cordyceps militaris* (Cmi), *Colletotrichum trifolii* (Ctr), *Talaromyces marneffeii* (Tma), *Aspergillus nidulans* (Anid), *Metarhizium robertsii* (Mro), *Metarhizium acridum* (Mac), *Candida albicans* (Cab)]. **(B)** Sequence comparison of Cdc42 with the orthologue in *Aspergillus nidulans* (Anid).

**Table S1.** Primers for constructing gene deletion or complementary strains.

| Primers           | Sequences                                                                                                                    | Purpose                                   |
|-------------------|------------------------------------------------------------------------------------------------------------------------------|-------------------------------------------|
| Cdc42-up-F/R      | TCCCCCGGGTCTTTCTGCCGAGTGAATGCC/<br>CGCGGATCCCGAAGACCAGCATACGAGCATAG                                                          | Cloning cdc42-5'                          |
| Cdc42-dn-F/R      | AAGCTCTAGATCAGATGCGTTGTTGTCGGAGAC/<br>GGACTAGTTAAATGCCAGGTGAAACAGG                                                           | Cloning cdc42-3'                          |
| Cdc42-com-<br>F/R | GGGGACAAGTTTGTACAAAAA-<br>GCAGGCTGCGATGTACGGATATAGATAGGCTG/GGG-<br>GACCACTTTGTACAAGAAAGCTGGGTCTGGGGG-<br>TATGATTGATTACAAAATG | Cloning full-length<br>cdc42              |
| Cdc42-id-F/R      | CCCCAGTCAACCTAATCACCAAATC/ GTAGAACAA-<br>GCCGTTAGCGTCATT                                                                     | Identification of<br>gene-deletion clones |
